1 **A mRNA-LNP vaccine against Dengue Virus elicits robust, serotype-**  
2 **specific immunity**

3

4 Clayton J. Wollner<sup>a</sup>, Michelle Richner<sup>a</sup>, Mariah A. Hassert<sup>b</sup>, Amelia K. Pinto<sup>b</sup>, James D. Brien<sup>b</sup>,  
5 Justin M. Richner<sup>a#</sup>

6

7 <sup>a</sup>Department of Microbiology and Immunology, University of Illinois College of Medicine,  
8 Chicago, IL, USA.

9 <sup>b</sup>Department of Molecular Microbiology and Immunology, St. Louis University College of  
10 Medicine, St. Louis, MO, USA.

11

12 Running Title: Dengue Virus mRNA-LNP Vaccine

13

14 #Address correspondence to Justin M. Richner, Ph.D., [richner@uic.edu](mailto:richner@uic.edu)

15

16 Abstract Word Count: 237

17 Text Word Count: 5854

18 **ABSTRACT**

19 Dengue virus (DENV) is the most common vector-borne viral disease with nearly 400 million  
20 worldwide infections each year concentrated in the tropical and subtropical regions of the world.  
21 Severe dengue complications are often associated with a secondary heterotypic infection of one  
22 of the four circulating serotypes. In this scenario, humoral immune responses targeting cross-  
23 reactive, poorly-neutralizing epitopes can lead to increased infectivity of susceptible cells via  
24 antibody-dependent enhancement (ADE). In this way, antibodies produced in response to  
25 infection or vaccination are capable of contributing to enhanced disease in subsequent  
26 infections. Currently, there are no available therapeutics to combat DENV disease, and there is  
27 an urgent need for a safe and efficacious vaccine. Here, we developed a nucleotide-modified  
28 mRNA vaccine encoding for the membrane and envelope structural proteins from DENV  
29 serotype 1 encapsulated into lipid nanoparticles (prM/E mRNA-LNP). Vaccination of mice  
30 elicited robust antiviral immune responses comparable to viral infection with high levels of  
31 neutralizing antibody titers and antiviral CD4<sup>+</sup> and CD8<sup>+</sup> T cells. Immunocompromised AG129  
32 mice vaccinated with the prM/E mRNA-LNP vaccine were protected from a lethal DENV  
33 challenge. Vaccination with either a wild-type vaccine, or a vaccine with mutations in the  
34 immunodominant fusion-loop epitope, elicited equivalent humoral and cell mediated immune  
35 responses. Neutralizing antibodies elicited by the vaccine were sufficient to protect against a  
36 lethal challenge. Both vaccine constructs demonstrated serotype specific immunity with minimal  
37 serum cross-reactivity and reduced ADE compared to a live DENV1 viral infection.

38

39 **IMPORTANCE**

40 With 400 million worldwide infections each year, dengue is the most common vector-born viral  
41 disease. 40% of the world's population is at risk with dengue experiencing consistent  
42 geographic spread over the years. With no therapeutics available and vaccines performing sub  
43 optimally, the need for an effective dengue vaccine is urgent. Here we develop and characterize  
44 a novel mRNA vaccine encoding for the dengue serotype 1 envelope and premembrane  
45 structural proteins that is delivered via a lipid nanoparticle. Our DENV1 prM/E mRNA-LNP  
46 vaccine induces neutralizing antibody and cellular immune responses in immunocompetent  
47 mice and protects an immunocompromised mouse from a lethal DENV challenge. Existing  
48 antibodies against dengue can enhance subsequent infections via antibody-dependent  
49 enhancement. Importantly our vaccine only induced serotype specific immune responses and  
50 did not induce ADE.

51

52 **ABBREVIATIONS:**

53 DENV – Dengue virus

54 LNP – Lipid NanoParticle

55 VLP – Virus Like Particle

56 prM – premembrane protein

57 E – envelope protein

58 FL – fusion-loop

59  $\Delta$ FL – mutant fusion-loop

60 UT – untransfected

61 EV – empty vector

62

## 63 INTRODUCTION

64 Dengue virus (DENV) is the most common vector-borne viral disease affecting humans(1–3). Its  
65 endemic region now contains 100 countries in Asia, the Pacific, the Americas, and the Middle  
66 East(3), with 40% of the world’s population at risk. Disease states during dengue infection  
67 manifest as a range of severities; from a self-limiting, febrile illness to more severe cases with  
68 life-threatening vascular leakage that can lead to multi-organ failure associated with a viral-  
69 driven cytokine storm (4, 5).

70

71 DENV is a member of the family *Flaviviridae* of which Zika virus, West Nile virus, yellow fever  
72 virus, and Japanese encephalitis virus are also members. It is spread by the arthropod vector  
73 *Aedes aegypti* and, to a much lesser extent, *Aedes albopictus*(2, 3). The virus contains a single-  
74 stranded, positive-sense RNA genome which codes for a single polypeptide containing three  
75 structural proteins; premembrane (prM), envelope (E), and capsid (C), as well as seven  
76 nonstructural proteins(6). Dengue virus is categorized into four distinct serotypes, dengue 1-4  
77 (DENV1-4), with amino acid sequence variations of 30-35% across serotypes.

78

79 Most countries with endemic dengue are affected by all four serotypes(1). Infection with a single  
80 serotype of DENV does not protect against a secondary infection of a heterologous serotype.  
81 Instead, primary infection increases an individual’s probability of developing severe clinical  
82 symptoms, including shock and death, upon a secondary heterotypic challenge. In this scenario,  
83 humoral immune responses after a primary infection produce cross-reactive, non-neutralizing  
84 antibodies. These antibodies can bind to infectious virus particles from a secondary, heterotypic  
85 challenge and lead to increased infection of cells possessing Fc $\gamma$  receptors via antibody-  
86 dependent enhancement (ADE). This poses a challenge for vaccination as a successful vaccine  
87 must elicit a neutralizing, long-lasting immune response balanced equally against all four  
88 serotypes of DENV.

89

90 DENV vaccines that have progressed the furthest in clinical evaluation include CYD-TDV  
91 (Dengvaxia, Sanofi-Pasteur), TAK-003 (DENVax, Takeda), and TV003 (NIAID/NIH)(7–11). All  
92 three of these vaccines are tetravalent, live-attenuated vaccines which encode for the  
93 membrane embedded DENV viral proteins prM and E, in different viral backbones. Other  
94 vaccine strategies are in various preclinical stages including recombinant E and subunit  
95 vaccines(12–15), purified inactive viruses(16), DNA encoding for prM and E(17, 18), and  
96 purified virus-like particles (VLP)(19–21). VLPs, like an infectious viral particle, are comprised of  
97 ENV-dimers on the surface resulting in production of particles that share many of the same  
98 three-dimensional epitopes as an infectious virus particle(21, 22).

99

100 Previously, we developed a mRNA vaccine against the related Zika virus encoding for the viral  
101 prM and E proteins(23, 24). This vaccine elicited a robust neutralizing antibody response that  
102 protected mice from a lethal Zika viral challenge and prevented vertical transmission of the virus  
103 to the fetus. mRNA vaccines have also been shown to provide protective immunity against viral  
104 pathogens in non-human primates(25, 26). In this study, we have developed a mRNA vaccine  
105 against DENV serotype 1. A construct coding for prM and E proteins was *in vitro* transcribed  
106 using the modified nucleotide pseudouridine and resulting mRNA was packaged into lipid  
107 nanoparticles (LNP). Following intramuscular injection mRNA-LNPs are taken up into the  
108 muscle cells at the site of injection, as well as antigen presenting cells in the draining lymph  
109 node(27, 28). Once the cells endocytose the mRNA-LNP, the LNP degrades in the acidified  
110 endosome releasing the mRNA into the cytoplasm. The mRNA is then translated into the viral  
111 prM-E proteins. The prM-E polyprotein is embedded in the membrane of the ER and cleaved by  
112 host protease into the individual viral proteins. The prM and E self-assemble into virus-like  
113 particles on the surface of the ER membrane and then the VLP is trafficked through the trans-  
114 Golgi network and secreted from the cell. Administration of the DENV1 prM/E mRNA-LNP

115 vaccine elicited neutralizing antibody titers and antiviral specific T cells in wild-type C57BL/6J  
116 mice and conferred protection in DENV permissive immunocompromised AG129 mice.  
117 Importantly the mRNA-LNP vaccine induced serotype specific immunity with low levels of ADE.

## 118 RESULTS

### 119 Design of DENV1 prM/E Construct and Viral Protein Expression

120 We designed a construct encoding for the wild-type nucleotide sequence of prM and E proteins  
121 from dengue serotype 1 (DENV1) strain 16007 downstream of a Japanese encephalitis virus  
122 (JEV) signal peptide. The coding sequence was flanked by a 5' untranslated region (UTR)  
123 previously utilized in other mRNA vaccines(23) and the 3' UTR from the human hemoglobin  
124 subunit alpha 1 mRNA (HBA1) (Figure 1A). The 5' and 3' UTRs contribute to translation  
125 regulation and mRNA stability essential for optimum protein expression. We *in vitro* transcribed  
126 mRNA from a T7 RNA polymerase promoter site upstream of the 5' UTR. A 5' cap-1 structure  
127 and a 3' poly-A tail were enzymatically added to produce fully mature messenger RNA that  
128 resembles host mRNA. We also generated a separate construct ( $\Delta$ FL) containing the amino  
129 acid substitutions G106R, L107D, and F108A to remove the fusion-loop epitope of the envelope  
130 protein. These mutations have been previously characterized and shown to ablate both fusion-  
131 loop activity and production of fusion-loop specific antibodies responsible for ADE(29–31).

132  
133 *In vitro* synthesized mRNA was transfected into 293T cells followed by collection of cell lysate  
134 and supernatant. We performed immunoblots with the monoclonal antibodies 1A1D-2 and 4G2.  
135 1A1D-2 is specific for domain III of the E protein(32–34) and 4G2 binds to the fusion-loop  
136 epitope. Western blots with the monoclonal antibody 1A1D-2 identified a band representing  
137 DENV1 E after transfection with both WT and  $\Delta$ FL constructs (Figure 1B), demonstrating  
138 successful viral protein expression. Western blots with 4G2 resulted in a band only in the lysate  
139 from wild-type transfected cells, thus revealing successful ablation of the fusion-loop epitope in  
140 the  $\Delta$ FL construct (Figure 1B). Expression of prM and E alone is sufficient to induce the  
141 formation and secretion of VLPs(23, 35, 36). To detect secreted VLPs, we purified the  
142 supernatant from the transfected cells via ultracentrifugation and analyzed on immunoblots. We



143 detected E protein bands with the 1A1D-2 antibody in the purified supernatant of WT and  $\Delta$ FL  
144 transfected supernatants (Figure 1C), demonstrating that fusion-loop ablation did not affect  
145 secretion of VLPs from transfected cells. We did not detect any GAPDH in the purified  
146 supernatants verifying that ultracentrifugation removed any cytoplasmic contamination. Particles  
147 secreted from transfected cells had similar properties of VLPs with relatively uniform semi-  
148 smooth surfaces and diameters of approximately 30nm, as confirmed by electron microscopy  
149 (Figure 1D). Together, these results show that *in vitro* synthesized mRNAs can induce viral  
150 structural protein expression and secretion of VLPs. Further, mutation of key amino acids within  
151 the fusion-loop successfully ablates the antigenic epitope while maintaining protein expression  
152 and VLP excretion.

153

#### 154 **Optimization of Protein Expression and LNP Delivery**

155 Signal peptides are short N-terminal peptides that traffic proteins through the appropriate  
156 processing and secretory pathways within the trans-golgi network. We compared different signal  
157 peptides on the DENV1  $\Delta$ FL construct to optimize protein expression. We generated five new  
158  $\Delta$ FL mRNA constructs with the original JEV signal peptide exchanged for signal peptides from  
159 either an interleukin-2 (IL2), tissue plasminogen activator (tPA), or gaussia luciferase (GLUC).  
160 Additionally, we synthesized two constructs with theoretical signal peptides computationally  
161 predicted to elicit robust protein secretion in skeletal muscle cells (SP1 and SP2)(37). Mice are  
162 administered the mRNA-LNP vaccine intramuscularly so characterization and optimization of  
163 protein expression in muscle cells is key. We transfected differentiated skeletal muscle  
164 myoblasts C2C12 cells with the different constructs and blotted for E protein expression with the  
165 1A1D-2 antibody. The TPA signal peptide resulted in the most robust E protein expression  
166 (Figure 2A). To ensure that signal peptide modification did not alter VLP secretion and directly  
167 compare VLP secretion across the different mRNA constructs, we also analyzed the

168 supernatant of transfected cells via dot blot with the 1A1D-2 mAb. The tPA signal peptide also  
169 results in the highest levels of VLP secretion (Figure 2B).

170

171 For *in vivo* administration, mRNA is synthesized with the modified nucleotide, pseudouridine, in  
172 place of uridine. This replacement dampens innate immune stimulation and interferon activation  
173 which inhibits protein translation(38). *In vitro* synthesized mRNA is further purified and  
174 encapsulated in a lipid nanoparticle (LNP). Encapsulation within an LNP shields the mRNA from  
175 extracellular RNAses, and ensures efficient delivery into cells(39). LNP are composed of pH  
176 sensitive lipids that bind to endogenous apolipoprotein E which facilitates entry. When the  
177 mRNA-LNP is endocytosed, the acidic environment of the late endosome initiates degradation  
178 of the LNP leading to release of the mRNA to the cytoplasm. We encapsulated mRNA  
179 containing the original JEV signal peptide that has been utilized in previous flavivirus mRNA  
180 vaccines. We achieved >90% encapsulation efficiency as determined by a ribogreen RNA  
181 quantification assay and stored encapsulated mRNA at 4°C for extended periods of time to  
182 accommodate a two- or three-shot vaccination schedule. Delivery of nucleotide-modified WT  
183 and  $\Delta$ FL prM/E mRNA-LNPs to C2C12 cells resulted in E protein expression in cell lysate  
184 (Figure 2C).

185

### 186 **DENV1 prM/E mRNA Vaccines Elicit Adaptive Immune Responses**

187 Initially, wild-type C57BL/6 mice were vaccinated according to a three-shot vaccination schedule  
188 with 10ug of mRNA per dose and serum collections at days 0 (pre-vaccination), day 28 (post-  
189 primary), day 42 (post-secondary), and day 56 (post-tertiary) as shown in Figure 3A. We  
190 quantified neutralizing antiviral antibody titers in serial dilutions of serum with a focus reduction  
191 neutralization test (FRNT) against the homologous DENV1 strain 16007. All mice within each  
192 cohort of WT and  $\Delta$ FL vaccine groups seroconverted with EC50 neutralizing titers (serum  
193 concentration at which 50% of the virus is neutralized) maxing out at ~1/200. WT and  $\Delta$ FL

194 prM/E mRNA-LNP vaccines elicited neutralizing antibody responses after a single dose with  
195 secondary and tertiary doses boosting titers (Figure 3B). A third vaccine dose did not  
196 significantly enhance the neutralizing antibody titers from that of a second dose (p-value = 0.20,  
197 WT). As such, a two-dose, prime-boost vaccination schedule was used in future studies. These  
198 data reveal that *in vivo* delivery of a mRNA-LNP vaccine induces a humoral immune response  
199 against the exogenous viral protein.

200

201 A separate cohort of mice were administered high or low doses (10 $\mu$ g versus 3 $\mu$ g per injection)  
202 of WT or  $\Delta$ FL prM/E mRNA-LNP vaccine in a prime-boost schedule (Figure 3C). We also  
203 included mice infected with live DENV1 (10<sup>5</sup> FFU DENV1) as a positive control and a mRNA  
204 vaccine encoding for GFP (10 $\mu$ g) as a negative control. We quantified the levels of antiviral IgG  
205 in the serum isolated from the different vaccine groups via an ELISA assay against purified  
206 DENV1 strain 16007. All mice receiving the infectious DENV1, WT mRNA vaccine or  $\Delta$ FL  
207 mRNA vaccine had significantly higher titers than mice receiving the GFP mRNA control  
208 vaccine (Fig 3D). No statistical differences were observed between the WT and  $\Delta$ FL vaccines.  
209 Viral-infected mice and mice receiving the high dose of the WT or  $\Delta$ FL vaccines all had antibody  
210 endpoint dilution titers of approximately 1x10<sup>5</sup>. The 3  $\mu$ g low dose of the vaccine induced  
211 antibody titers slightly lower than the higher 10  $\mu$ g. Serum neutralization titers were determined  
212 via FRNT assays (Figure 3E-F) against infectious DENV1 strain 16007. High and low dose of  
213 the WT prM/E mRNA vaccine elicited EC50 values of 1/420 and 1/263, respectively, revealing  
214 little to no dose dependent response (Figure 3F, p-value = 0.36). Additionally, high and low  
215 doses of the  $\Delta$ FL vaccine resulted in similar EC50 values of 1/329 and 1/175, respectively.  
216 These differences were not statistically significant (Figure 3F, p-value = 0.29). The WT and  $\Delta$ FL  
217 vaccinated mice had lower neutralizing titers than the DENV1 virus infected mice (EC50 =  
218 1/729), although these differences were not statistically significant. All vaccines or infections

219 resulted in higher neutralizing values than the GFP vaccinated mice (Figure 3E, p-value  
220 <0.001). Neutralizing titers of WT and  $\Delta$ FL vaccinated mice were very similar, indicating that  
221 fusion-loop mutation did not alter humoral immune responses.

222

223 To quantify antiviral T cells, splenocytes were harvested from vaccinated mice at day 56 after a  
224 tertiary vaccination schedule and stimulated with a pooled 15mer overlapping peptide array for  
225 the ENV protein from DENV1 or DENV2 as well as the NS1 protein from DENV1. Stimulated  
226 cells were analyzed for intracellular IFN $\gamma$  by flow cytometry and antiviral IFN $\gamma$ <sup>+</sup> T cells were  
227 quantified. prM/E mRNA vaccines elicited modest, yet significant antiviral CD4<sup>+</sup> and CD8<sup>+</sup> T cell  
228 responses specific for the DENV1 ENV protein, with equivalent levels between the WT and  $\Delta$ FL  
229 vaccines (Figure 4 and Supplemental Figure 1). No T cell responses were detected against the  
230 homologous DENV2 E protein or the irrelevant DENV1 NS1 protein. Thus, prM/E mRNA-LNP  
231 vaccines elicit both humoral and cellular immune responses against DENV1 E protein.

232

### 233 **DENV1 prM/E mRNA Vaccines Protect against a Lethal Challenge**

234 AG129 mice lack the type I interferon  $\alpha/\beta$  receptor and the type II interferon  $\gamma$  receptor, and they  
235 are permissive to a lethal DENV challenge(40–42). All serotypes of DENV are capable of  
236 replication in AG129 mice with quantifiable viremia, vascular leakage, and increased cytokine  
237 levels. Some strains can induce more severe disease states, indicative of severe disease in  
238 humans, such as DENV2 D2S20 or DENV1 Western Pacific(40, 42). AG129 mice were  
239 vaccinated according to the previously described schedule (Figure 3C) with GFP mRNA-LNP or  
240 DENV1 wild-type prM/E mRNA-LNP. Serum was collected from vaccinated mice and analyzed  
241 for neutralization titers as previously described. DENV1 prM/E mRNA-LNP vaccination induced  
242 EC50 values of greater than 1/3000 (Figure 5A-B). Vaccinated AG129 mice were challenged  
243 with 10<sup>6</sup> FFU DENV1 Western Pacific strain and monitored for 40 days post infection. Mice  
244 receiving the GFP mRNA-LNP vaccine lost weight beginning at day 6 and all mice succumbed

245 to viral infection by day 32 post infection. DENV1 prM/E mRNA-LNP vaccinated mice did not  
246 show any signs of morbidity or mortality with weight remaining stable post infection and 100% of  
247 the mice surviving (Figure 5C-D). These data demonstrate that an DENV1 prM/E mRNA-LNP  
248 vaccine protects against a lethal DENV1 challenge in an immunocompromised mouse model.

249

250 The DENV1 prM/E mRNA vaccine elicited both antiviral antibodies and antiviral T cell response.  
251 We hypothesized that the antiviral antibodies are sufficient to protect against a lethal challenge.  
252 To address this hypothesis, we adoptively transferred pooled serum from WT vaccinated mice  
253 into AG129 mice. As controls, a second group of mice received pooled serum from naïve mice  
254 and a third group of mice received PBS. One day after adoptive transfer, mice were challenged  
255 with  $10^6$  FFU DENV1 Western Pacific strain and monitored for 40 days post infection (Figure 6).  
256 Seven out of 8 mice that received serum from the vaccinated mice were protected against  
257 lethality. Six out of seven mice that received naïve serum lost weight and succumbed to viral  
258 lethality post challenge. Thus, antibodies elicited by the DENV1 prM/E mRNA-LNP vaccine are  
259 sufficient for protection.

260

### 261 **DENV1 prM/E mRNA Vaccination Induces Serotype-Specific Humoral Immunity**

262 Infection with DENV will lead to antibodies that cross-react with heterotypic DENV serotypes  
263 with the potential to cause ADE. We characterized the cross-reactive immune response in the  
264 serum of the prM/E mRNA vaccinated mice. DENV1 vaccines did not elicit neutralizing  
265 antibodies against DENV2 (strain New Guinea C) in a FRNT assay (Supplemental Figure 2).  
266 We characterized ADE by incubating DENV2 with serial dilutions of serum from vaccinated mice  
267 before infecting Fc $\gamma$  receptor-positive K562 cells. Infection was determined via flow cytometry  
268 with the monoclonal antibody 1A1D-2 against the viral E protein. The percentage of infected  
269 cells was compared to a DENV2 infection in the absence of immune sera (Figure 7A). Serum  
270 from DENV1 viral-infected mice significantly enhanced DENV2 infections, even with dilutions as

271 high as 1/6,000. At a serum dilution of 1/100, an 8-fold enhancement was observed.  
272 Conversely, serum from mRNA vaccinated mice induced very low levels of DENV2  
273 enhancement (Figure 7A), with only a 1.2-fold enhancement at a 1/100 serum dilution (Figure  
274 7B). The amino acid sequence of the WT prM/E mRNA-LNP vaccine was identical to the  
275 sequence of the infecting virus. Surprisingly, WT and  $\Delta$ FL mRNA vaccines enhanced  
276 heterotypic DENV2 to nearly identical values. Similar results were seen with DENV4 (data not  
277 shown). As a negative control, serum from naïve mice showed no enhancement at any dilution.  
278 To assess the role of ADE on viral replication and egress, we quantified the levels of infectious  
279 virus in the supernatant of K562 cells infected with immune-complexed virus. Serum from WT or  
280  $\Delta$ FL vaccinated mice enhanced viral replication relative to serum from GFP vaccinated mice,  
281 however enhancement was significantly lower than serum from viral-infected mice, in  
282 agreement with the flow cytometry data (Supplemental Figure 3). These data demonstrate that  
283 DENV1 prM/E mRNA vaccines do not induce antibodies which elicit heterotypic enhancement,  
284 in contrast to a viral infection.

## 285 **DISCUSSION**

286 Despite a longstanding effort in the field, there still remains an unmet need for a DENV vaccine  
287 that elicits robust, balanced immune response against all four serotypes. Here, we developed a  
288 vaccine against DENV1 with a modified mRNA encoding for the prM and ENV viral proteins  
289 encapsulated in a lipid nanoparticle (LNP). The mRNA-LNP vaccine platform has now been  
290 developed for several viruses including rabies virus(26), influenza virus(26), and HIV(43). More  
291 recently, mRNA vaccines have been rapidly developed against SARS coronavirus 2 (SARS-  
292 CoV-2). Moderna's mRNA-1273 and Bio-N-Tech mRNA BNT162b1 were the first vaccine  
293 candidates to show safety and efficacy in human trials demonstrating the speed of the mRNA  
294 platform and its role in emerging infectious diseases(44–46). In the flavivirus field, mRNA  
295 vaccines have been developed against Zika virus(23, 24) and Powassan virus(47). These  
296 flavivirus vaccines encode for the viral structural proteins which are expressed and lead to the  
297 development of neutralizing antibodies against the viral structural proteins. Recently another  
298 group published the results of a mRNA vaccine against DENV2(48). Zhang et al developed  
299 mRNA vaccines encoding for full length prM-ENV, the soluble portion of ENV, and NS1. Similar  
300 to unpublished results from our lab, and contrary to our results with the DENV1 constructs  
301 presented herein, Zhang et al observed poor expression of the ENV protein from the prM-ENV  
302 DENV2 mRNA construct. Vaccination with the mRNA encoding for the soluble portion of DENV2  
303 ENV (E80) elicited humoral and cell mediated immune responses that protected against a lethal  
304 challenge with a homologous serotype of DENV2, similar to our findings with a DENV1 serotype  
305 mRNA vaccine. However, the DENV2 E80 mRNA vaccine induced serotype cross-reactive  
306 immune responses and high levels of heterologous ADE(48). On the contrary, our mRNA  
307 vaccine elicits serotype specific immune responses with low levels of heterotypic ADE.  
308  
309 High level of antigen expression is key for the success of mRNA vaccines. The signal peptide  
310 plays a critical role in directing the translated protein into the appropriate locations for

311 processing and secretion. Previous flaviviral mRNA vaccines have included a N-terminal JEV or  
312 IgE signal peptide(23, 24, 48). In our study, the tPA signal peptide led to far greater ENV  
313 expression and VLP secretion in C2C12 cells compared to other signal peptides, including the  
314 JEV signal peptide. All *in vivo* studies here were performed with the original vaccine construct  
315 encoding for the JEV signal peptide, but we predict that future vaccine formulations with the tPA  
316 signal peptide will lead to greater antigen expression and higher antiviral antibody titers.

317

318 The DENV1 mRNA-LNP vaccine elicited humoral and cell mediated immunity following a two-  
319 dose vaccination regimen with antibody titers of 1/120,000 and neutralizing titers of 1/420 (WT  
320 10 $\mu$ g). The antiviral antibodies were sufficient for protection. The neutralizing antibody titers  
321 reported here are similar to other DENV1 vaccination strategies. Neutralization EC50 titers of  
322 approximately 1/100 were achieved by administration of a DNA vaccine encoding for the  
323 modified viral structural proteins(29). DENV1 purified-VLP vaccine generated with fusion-loop  
324 mutants resulted in neutralization EC50 titers of approximately 1/1,000(31). In phase III human  
325 clinical trials, the CYD-TDV (Dengvaxia) vaccine elicited EC50 neutralization titers of  
326 approximately 1/60 in seronegative individuals(49), and TAK-003 neutralization titers reached  
327 1/184(50). In phase I human studies TV003 elicited neutralization EC50 titers of 1/63 against  
328 DENV1(51).

329

330 The neutralizing antibody titers in the AG129 vaccinated mice (EC50 of 1/3,125) were  
331 significantly higher than in the C57Bl/6 mice (EC50 of 1/420) following equivalent vaccination  
332 schedules (p value <0.001). Likely, the lower neutralization titers in C57Bl/6 mice are due to  
333 decreased antigen expression in the presence of an intact type I interferon response. Indeed,  
334 previous studies have demonstrated that mRNA vaccines engage RNA-sensing pattern  
335 recognition receptors and activate the type I IFN pathway leading to eIF2 $\alpha$  phosphorylation and  
336 blunted translation of the exogenous transcript(39, 52). Increasing vaccine efficacy could be



337 achieved through lowering the RNA-sensing and IFN response. We have included the  
338 pseudouridine modification in our DENV1 prM/E mRNA-LNP vaccine, but further modifications  
339 such as 5-methylcytosine could further lower innate immune stimulation and increase antigen  
340 expression and associated antibody titers(39).

341

342 In humans, CD4<sup>+</sup> and CD8<sup>+</sup> T cells predominantly target capsid and NS3, respectively, following  
343 a DENV infection(53). Although our vaccine does not encode for these immunodominant T cell  
344 epitopes, we detected antiviral CD4<sup>+</sup> and CD8<sup>+</sup> T cell responses against the E protein in the  
345 vaccinated mice. Intriguingly, the CD4<sup>+</sup> and CD8<sup>+</sup> T cell responses were not cross-reactive with  
346 other DENV serotypes, likely due to the high variability across the different DENV serotypes in  
347 the E protein. The overall magnitude of the T cell response from our vaccine was lower than a  
348 recently described mRNA vaccine against DENV1 which encoded for the immunodominant HLA  
349 epitopes from the nonstructural proteins of DENV(54). Our vaccine was designed to elicit  
350 antibodies against the structural proteins to neutralize infectious virus particles as opposed to  
351 robust T cell responses. Although we cannot rule out a role for antiviral T cells in a vaccinated  
352 host, neutralizing antibodies in serum were sufficient to protect against a lethal homotypic  
353 challenge in a passive transfer model. Together these studies demonstrate that mRNA  
354 vaccines can be developed to induce both protective T and antibody-dependent immunity  
355 against DENV.

356

357 Interestingly, the prM/E mRNA vaccines elicited serotype specific antibody responses. Serum  
358 from DENV1 virally-infected mice enhanced a DENV2 *in vitro* infection, whereas heterotypic  
359 ADE was largely absent with serum from the mRNA vaccinated mice. These observations are  
360 surprising given that neutralization titers were similar between the virally-infected and  
361 vaccinated mice, and the identical amino acid sequences shared between the WT mRNA  
362 vaccine and the infecting DENV1 16007 strain. Further, this suggests that the polyclonal

363 antibody repertoire induced by the mRNA vaccine is inherently different than the polyclonal  
364 repertoire induced during a viral infection. In our previous study, mutation of the fusion-loop  
365 epitope on the Zika virus mRNA vaccine led to ablation of cross reactive DENV enhancement  
366 through ADE(23). Similarly, in previous studies with VLP and DNA based vaccines, mutation of  
367 the fusion-loop epitope lowered the prevalence of ADE(29, 55). Unexpectedly, mutation of the  
368 fusion-loop epitope in the mRNA vaccine did not alter ADE. These findings suggest that  
369 antibodies against the fusion-loop epitope are not dominant in the polyclonal response to our  
370 mRNA vaccine. Future efforts will focus on identification of the structural epitopes within the  
371 VLP secreted from a viral infection and a mRNA-LNP vaccine.

372

373 In this study, we have demonstrated that a mRNA vaccine encoding the prM and E proteins  
374 from DENV1 can elicit robust adaptive immune responses and protect against a lethal viral  
375 challenge. This study paves the way for future development of mRNA vaccines against the  
376 remaining DENV serotypes with the ultimate goal of developing a tetravalent vaccine that will  
377 elicit a balanced, protective immune response against all four DENV strains. Current leading  
378 vaccination efforts rely on live attenuated virus, yet these vaccines fall short in either their ability  
379 to induce a broadly neutralizing antibody response or their ability to avoid ADE. Counter to live  
380 attenuated vaccines in which differential replication of the attenuated viruses will dictate antigen  
381 dosing *in vivo*, the antigen dose can be carefully modulated with mRNA vaccines to elicit a  
382 balanced immune response. Additionally, mRNA vaccines will allow the modification of epitopes  
383 which elicit ADE yet are impossible to incorporate into a live attenuated vaccine due to their  
384 critical role in viral replication.

385

## 386 MATERIALS AND METHODS

387

### 388 Viruses and Cells

389 DENV serotype 1 strain 16007 and DENV serotype 2 strain New Guinea C was provided by  
390 Michael Diamond at Washington University in St. Louis. DENV serotype 4 strain UIS 497 was  
391 obtained through BEI Resources (NR-49724), NIAID, NIH as part of the WRCEVA program.  
392 Viral stocks were propagated in C6/36 cells and titers determined by a focus-forming assay  
393 (FFA). All propagated viral stocks were deep sequenced to confirm viral strain. FFAs were  
394 performed to titer viral stocks with monoclonal antibody clone 9.F.10 obtained through Santa  
395 Cruz Biotechnology (Cat# SC-70959). Experiments with DENV were conducted under biosafety  
396 level 2 (BSL2) containment at the University of Illinois College of Medicine or St. Louis  
397 University College of Medicine with institutional Biosafety Committee approval. Vero-E6 cells  
398 (Cat# CRL 1586) and K562 cells (Cat# CCL-243) were obtained from American Type Culture  
399 Collection (ATCC) and maintained for low passage number following ATCC guidelines. C6/36  
400 cells were provided by the Diamond lab at Washington University in St. Louis, C2C12 cells were  
401 obtained from Ahke Heydemann, University of Illinois at Chicago, and 293T cells were obtained  
402 from Donna MacDuff at University of Illinois at Chicago.

403

### 404 Generation of mRNA and mRNA-LNP

405 Wild-type constructs encoding for dengue serotype 1 strain 16007 prM and Env viral proteins  
406 were synthesized by Integrated DNA Technologies (IDT). Constructs contained a T7 promoter  
407 site for *in vitro* transcription of mRNA, 5' UTR and 3' UTRs, and a Japanese encephalitis virus  
408 signal peptide. The sequence of the 5' and 3' UTRs were identical to previous publications with  
409 a ZIKV mRNA vaccine(23, 24). mRNA was synthesized from linearized DNA with T7 *in vitro*  
410 transcription kits from CellScript and following manufacturer's protocol. Standard mRNA was  
411 produced with unmodified nucleotides (Cat# C-MS11610). RNA to be encapsulated in lipid

412 nanoparticles was generated with pseudouridine in place of uridine with the Incognito mRNA  
413 synthesis kit (Cat# C-ICTY110510). 5' cap-1 structure and 3' poly-A tail were enzymatically  
414 added. mRNA was encapsulated into lipid nanoparticles using the PNI Nanosystems  
415 NanoAssemblr Benchtop system. mRNA was dissolved in PNI Formulation Buffer (Cat#  
416 NWW0043) and was run through a laminar flow cartridge with GenVoy ILM (Cat# NWW0041)  
417 encapsulation lipids at a flow ratio of 3:1 (RNA in PNI Buffer : Genvoy ILM) at total flow rate of  
418 12 mL/min to produce mRNA-LNPs. These mRNA-LNPs were characterized for encapsulation  
419 efficiency and mRNA concentration via RiboGreen Assay using Invitrogen's Quant-iT Ribogreen  
420 RNA Assay Kit (Cat# R11490).

421

## 422 **Mouse Experiments**

423 C57BL/6J mice were purchased from Jackson Laboratory and housed in the pathogen free  
424 Biomedical Resources Laboratory at University of Illinois College of Medicine. AG129 mice were  
425 bred in the animal facilities at Saint Louis University. For vaccinations, mice were injected  
426 intramuscularly in the thigh with 50  $\mu$ l of the indicated amount and type of mRNA-LNP  
427 suspended in PBS. Vaccinated C57BL/6J mice were challenged with  $1 \times 10^5$  FFU of DENV1  
428 strain 16007, retro-orbitally. Vaccinated AG129 mice were challenged with  $10^6$  FFU of DENV1  
429 strain West Pac, intravenously. For serum adoptive transfer studies, serum from vaccinated or  
430 naïve mice were pooled and then 200 $\mu$ l administered IV into naïve AG129 mice one day prior to  
431 challenge with DENV1. The vaccination and viral challenge protocols were approved by the  
432 Institutional Animal Care and Use Committee (IACUC) at the University of Illinois College of  
433 Medicine (protocol # 18-114) and St. Louis University (assurance # D16-00141).

434

## 435 ***In Vitro* Transfections**

436 293T and C2C12 cells were transfected with mRNA using the Mirus TransIT RNA transfection  
437 kit (Cat# MIR 2225) according to manufacturer's protocol. 293T cells were 60-70% confluent at

438 time of transfection with C2C12 cells being 100% confluent at time of transfection to achieve  
439 differentiation into muscle tissue. Supernatant was collected 24 hours post-transfection. To  
440 collect lysate, cells were washed with PBS and lysed with RIPA buffer (Millipore-Sigma, Cat#  
441 R0278). Lysate and supernatant were centrifuged at 16,000 x g for 10 min at 4°C to remove cell  
442 debris. Supernatant from transfected cells was purified using a 20% sucrose cushion and  
443 ultracentrifugation at 141,000 x g O/N (16 hours) at 4°C. Purified protein complexes were  
444 resuspended in 50µl 1% BSA/PBS for subsequent storage and analysis.

445

#### 446 **Viral Protein Detection**

447 For western blot analysis, 10ul of lysate or purified supernatant samples were run on a 4-12%  
448 Bis-Tris SDS-PAGE Gel (Invitrogen, Cat #NW04120BOX) with subsequent transfer to 0.45 µm  
449 PVDF membrane. Membranes were blocked in TBST (10 nM Tris-HCl, PH 7.5, 150 nM NaCl,  
450 and 1% Tween 20) buffer with 5% skim milk. Membranes were blotted with envelope domain III  
451 specific 1A1D-2 (1:600) monoclonal antibody (CDC Arbovirus Reference Collection) or  
452 envelope fusion-loop specific 4G2 (3.33 mg/ml) (BEI Cat# NR-50327, Novus Biologicals Cat#  
453 NBP2-52709FR). Secondary antibody goat anti-Mouse HRP (200 ng/ml) (Invitrogen Cat#  
454 A16072) in blocking buffer allowed for detection of dengue viral envelope proteins. Western  
455 blots were imaged on ChemiDoc Imager system (Bio-Rad).

456

457 For dot blot analysis, clarified transfection supernatant was diluted 1/4 in a 20 µl volume of  
458 transfer buffer (Life Technologies Cat# NP0006-1) and applied dropwise to a presoaked 0.45  
459 µm PVDF membrane. Sample was allowed to infiltrate membrane through capillary action for no  
460 more than one hour (before blot starts to dry). Blots were stained and imaged in the same  
461 manner as western blots above.

462

463 **Electron Microscopy**

464 One T-75 cell culture flask was seeded with 293T cells at 70-80% confluency the day of  
465 transfection. The flask was transfected with 20 $\mu$ g of mRNA encoding WT DENV1 prM and  
466 envelope protein using the Mirus TransIT RNA transfection kit (Cat# MIR 2225) according to  
467 manufacturer's protocol. Supernatant was collected 48 hours post-transfection. Supernatant  
468 was centrifuged at 16,000 x g for 10 min at 4°C to remove cell debris. 6ml of supernatant was  
469 then dialyzed overnight at 4°C in 20,000 MWCO Slide-A-Lyzer Dialysis Cassettes (Cat# 66003)  
470 submerged and spinning in PBS. Dialyzed sample was provided to UIC electron microscopy  
471 core for imaging using the following parameters. 10-15 $\mu$ l of sample was loaded drop-wise onto a  
472 300-mesh, Formvar/Carbon-coated copper EM grid with excess removed by filter paper via  
473 capillary action. One drop 2% Uranyl acetate solution was deposited onto EM grid with excess  
474 removed by filter paper via capillary action. Once grid was allowed to dry further, sample was  
475 examined via transmission electron microscopy using JEOL JEM-1400F transmission electron  
476 microscope, operating at 80 kV. Digital micrographs were acquired using an AMT BioSprint  
477 12M-B CCD Camera and AMT software (Version 701).

478

479 **ELISA Assay**

480 Four T-150 cell culture flasks of C6/36 cells were infected with WT DENV1 at an MOI of 0.1.  
481 Seven days after infection, 60ml of supernatant was collected and clarified via centrifugation at  
482 3,200 x g for 10 min at 4°C. Supernatant was further purified via 20% sucrose cushion  
483 ultracentrifugation at 141,000 x g for 2 hours at 4°C to pellet virus. Virus pellets were  
484 resuspended in PBS for a total volume of 5mL. ELISA plates were coated overnight at 4°C with  
485 50 $\mu$ l/well of 1:25 dilution of concentrated viral stock (1E3 FFU/well) in coating buffer (0.1 M  
486 sodium carbonate, 0.1 sodium bicarbonate, 0.02% sodium azide at pH 9.6). After coating  
487 overnight, plates were incubated with blocking buffer (PBST, 2% BSA, 0.025% Sodium azide)

488 for one hour at 37°C. Plates were then incubated with 50µl of serial dilutions of vaccine and  
489 virus enhanced mouse serum at 4°C overnight. Plates were subsequently incubated with goat  
490 anti-Mouse HRP secondary antibody (200 ng/ml) (Invitrogen Cat# A16072) in blocking buffer for  
491 one hour at room temperature. ELISA plates were developed using 100µl of TMB substrate  
492 (Thermo Fisher Cat# 34029). OD 450 reading was measured via BioTek ELISA microplate  
493 reader.

494

#### 495 **Serum Neutralization Assay**

496 Focus Reduction Neutralization Assays (FRNT) were performed as described previously(23).  
497 Briefly, serial dilutions of heat-inactivated serum from vaccinated mice were incubated with 50-  
498 70 focus forming units of DENV for one hour at 37°C before infecting a monolayer of Vero cells  
499 in a 96 well plate. One hour after infection, cells were overlaid with 1% (w/v) methylcellulose in  
500 2% FBS, 1XMEM. Plates were fixed for 30 minutes with 4% PFA 48 hours after infection.  
501 Staining involved 1° antibody 9.F.10 (500 ng/ml) and 2° antibody goat anti-Mouse HRP (200  
502 ng/ml) in PermWash Buffer (0.1% Saponin, 0.1% BSA, in PBS). Treatment with TrueBlue  
503 peroxidase substrate (KPL) produced focus forming units that were quantified on the  
504 ImmunoSpot® ELISpot plate scanner (Cellular Technology Limited).

505

#### 506 **Antiviral T Cell Quantification**

507 Spleens were collected from vaccinated mice and splenocytes collected. An overlapping 15mer  
508 peptide library from DENV2 ENV, DENV1 ENV, and DENV NS1 was obtained from BEI  
509 Resources, NIAID, NIH, (Catalog #'s NR-507, NR-9241, and NR-2751). Individual peptides  
510 were pooled for ex vivo T cell stimulation. Spleens were ground over a 40 µm cell strainer  
511 and brought up in Roswell Park Memorial Institute (RPMI) 1640 Medium with 10% FBS,  
512 HEPES ((4-(2-hydroxyethyl)-1-piperazineethanesulfonic acid)), and 0.05 mM β-

513 mercaptoethanol. Then,  $2 \times 10^6$  cells were plated per well in a round bottom 96-well plate  
514 and stimulated for 6 h at 37 °C, 5% CO<sub>2</sub> in the presence of 10 µg/mL brefeldin A and 10  
515 µg of pooled peptide in 90% DMSO. Following peptide stimulation, cells were washed  
516 once with PBS and stained for the following surface markers: α-CD8-PerCP-Cy 5.5  
517 (clone 53–6.7), α-CD3-AF700 (clone 500A2), and α-CD19-BV605 (clone 1D3). Cells  
518 were then fixed, permeabilized, and stained for the following intracellular marker: α-IFN-  
519 γ-APC (clone B27). The cells were analyzed by flow cytometry using an Attune-NXT.

520

#### 521 **ADE Flow Assay**

522 Serial dilutions of heat-inactivated serum from naïve, vaccinated, or viral-infected mice were  
523 mixed with DENV2 and incubated for one hour at 37°C. Fc-γ receptor (CD32A) positive K562  
524 cells were infected with immuno-complexed virus at an MOI of 1 in a 96 well plate. After a 15-  
525 hour incubation, cells were fixed with 4% PFA for 30 minutes and stained for intracellular ENV  
526 with 1A1D-2 (1/500) monoclonal antibody and anti-mouse 647-conjugated antibody (2 µg/ml,  
527 Invitrogen Cat# A21235).

528

#### 529 **ADE Viral Replication Assay**

530 Serum from viral-infected mice and mice receiving the WT, ΔFL, or GFP mRNA vaccine were  
531 separately pooled and heat-inactivated. Serum was mixed with DENV2 and incubated for one  
532 hour at 37°C at a 1/100 dilution. 10,000 Fc-γ receptor (CD32A) positive K562 cells were infected  
533 with immuno-complexed virus at an MOI of 1 in a 200µl volume in a 96 well plate. After a 48-  
534 hour incubation to allow viral replication and egress, cells were centrifuged to separate cells  
535 from supernatant. Viral titers in supernatant were determined via FFA as described above.

536

#### 537 **Data Analysis**



538 All data were analyzed with GraphPad Prism software. Statistical significance was determined  
539 via unpaired T-tests for comparison of antibody titers, and log-rank tests for comparisons of  
540 survival curves. Flow cytometry data was analyzed using FlowJo software (BD Biosciences).  
541

## 542 References

- 543 1. Messina JP, Brady OJ, Scott TW, Zou C, Pigott DM, Duda KA, Bhatt S, Katzelnick L, Howes  
544 RE, Battle KE, Simmons CP, Hay SI. 2014. Global spread of dengue virus types: mapping the  
545 70 year history. *Trends Microbiol* 22:138–146.
- 546 2. Bhatt S, Gething PW, Brady OJ, Messina JP, Farlow AW, Moyes CL, Drake JM, Brownstein  
547 JS, Hoen AG, Sankoh O, Myers MF, George DB, Jaenisch T, Wint GRW, Simmons CP, Scott  
548 TW, Farrar JJ, Hay SI. 2013. The global distribution and burden of dengue. 7446. *Nature*  
549 496:504–507.
- 550 3. World Health Organization. Dengue and severe dengue.
- 551 4. Srikiatkachorn A, Mathew A, Rothman AL. 2017. Immune-mediated cytokine storm and  
552 its role in severe dengue. *Semin Immunopathol* 39:563–574.
- 553 5. 2009. Dengue: guidelines for diagnosis, treatment, prevention, and control New ed. TDR :  
554 World Health Organization, Geneva.
- 555 6. Pierson TC, Diamond MS. 2013. Chapter 26 Flaviviruses *Fields virology*. Wolters Kluwer  
556 Health/Lippincott Williams & Wilkins, Philadelphia.
- 557 7. Vannice KS, Wilder-Smith A, Barrett ADT, Carrijo K, Cavaleri M, de Silva A, Durbin AP, Endy  
558 T, Harris E, Innis BL, Katzelnick LC, Smith PG, Sun W, Thomas SJ, Hombach J. 2018. Clinical  
559 development and regulatory points for consideration for second-generation live  
560 attenuated dengue vaccines. *Vaccine* 36:3411–3417.
- 561 8. Juraska M, Magaret CA, Shao J, Carpp LN, Fiore-Gartland AJ, Benkeser D, Girerd-Chambaz  
562 Y, Langevin E, Frago C, Guy B, Jackson N, Duong Thi Hue K, Simmons CP, Edlefsen PT,  
563 Gilbert PB. 2018. Viral genetic diversity and protective efficacy of a tetravalent dengue  
564 vaccine in two phase 3 trials. *Proc Natl Acad Sci U S A* 115:E8378–E8387.
- 565 9. Silva AM de, Harris E. 2018. Which Dengue Vaccine Approach Is the Most Promising, and  
566 Should We Be Concerned about Enhanced Disease after Vaccination? The Path to a  
567 Dengue Vaccine: Learning from Human Natural Dengue Infection Studies and Vaccine  
568 Trials. *Cold Spring Harb Perspect Biol* 10:a029371.
- 569 10. Whitehead SS, Durbin AP, Pierce KK, Elwood D, McElvany BD, Fraser EA, Carmolli MP,  
570 Tibery CM, Hynes NA, Jo M, Lovchik JM, Larsson CJ, Doty EA, Dickson DM, Luke CJ,  
571 Subbarao K, Diehl SA, Kirkpatrick BD. 2017. In a randomized trial, the live attenuated  
572 tetravalent dengue vaccine TV003 is well-tolerated and highly immunogenic in subjects  
573 with flavivirus exposure prior to vaccination. *PLoS Negl Trop Dis* 11.

- 574 11. Sharma M, Glasner DR, Watkins H, Puerta-Guardo H, Kassa Y, Egan MA, Dean H, Harris E.  
575 2020. Magnitude and Functionality of the NS1-Specific Antibody Response Elicited by a  
576 Live-Attenuated Tetravalent Dengue Vaccine Candidate. *J Infect Dis* 221:867–877.
- 577 12. Khetarpal N, Poddar A, Nemani SK, Dhar N, Patil A, Negi P, Perween A, Viswanathan R,  
578 Lünsdorf H, Tyagi P, Raut R, Arora U, Jain SK, Rinas U, Swaminathan S, Khanna N. 2013.  
579 Dengue-specific subviral nanoparticles: design, creation and characterization. *J*  
580 *Nanobiotechnology* 11:15.
- 581 13. Poggianella M, Campos JLS, Chan KR, Tan HC, Bestagno M, Ooi EE, Burrone OR. 2015.  
582 Dengue E Protein Domain III-Based DNA Immunisation Induces Strong Antibody Responses  
583 to All Four Viral Serotypes. *PLoS Negl Trop Dis* 9:e0003947.
- 584 14. Ramasamy V, Arora U, Shukla R, Poddar A, Shanmugam RK, White LJ, Mattocks MM, Raut  
585 R, Perween A, Tyagi P, de Silva AM, Bhaumik SK, Kaja MK, Villinger F, Ahmed R, Johnston  
586 RE, Swaminathan S, Khanna N. 2018. A tetravalent virus-like particle vaccine designed to  
587 display domain III of dengue envelope proteins induces multi-serotype neutralizing  
588 antibodies in mice and macaques which confer protection against antibody dependent  
589 enhancement in AG129 mice. *PLoS Negl Trop Dis* 12:e0006191.
- 590 15. Arora U, Tyagi P, Swaminathan S, Khanna N. 2013. Virus-like particles displaying envelope  
591 domain III of dengue virus type 2 induce virus-specific antibody response in mice. *Vaccine*  
592 31:873–878.
- 593 16. Schmidt AC, Lin L, Martinez LJ, Ruck RC, Eckels KH, Collard A, De La Barrera R, Paolino KM,  
594 Toussaint J-F, Lepine E, Innis BL, Jarman RG, Thomas SJ. 2017. Phase 1 Randomized Study  
595 of a Tetravalent Dengue Purified Inactivated Vaccine in Healthy Adults in the United  
596 States. *Am J Trop Med Hyg* 96:1325–1337.
- 597 17. Danko JR, Kochel T, Teneza-Mora N, Luke TC, Raviprakash K, Sun P, Simmons M, Moon JE,  
598 De La Barrera R, Martinez LJ, Thomas SJ, Kenney RT, Smith L, Porter KR. 2018. Safety and  
599 Immunogenicity of a Tetravalent Dengue DNA Vaccine Administered with a Cationic Lipid-  
600 Based Adjuvant in a Phase 1 Clinical Trial. *Am J Trop Med Hyg*, 2018/01/18 ed. 98:849–  
601 856.
- 602 18. Danko JR, Beckett CG, Porter KR. 2011. Development of dengue DNA vaccines. *Vaccine*  
603 29:7261–7266.
- 604 19. Rajpoot RK, Shukla R, Arora U, Swaminathan S, Khanna N. 2018. Dengue envelope-based  
605 ‘four-in-one’ virus-like particles produced using *Pichia pastoris* induce enhancement-  
606 lacking, domain III-directed tetravalent neutralising antibodies in mice. *Sci Rep* 8:8643.
- 607 20. Boigard H, Cimica V, Galarza JM. 2018. Dengue-2 virus-like particle (VLP) based vaccine  
608 elicits the highest titers of neutralizing antibodies when produced at reduced  
609 temperature. *Vaccine* 36:7728–7736.

- 610 21. Shen W-F, Galula JU, Liu J-H, Liao M-Y, Huang C-H, Wang Y-C, Wu H-C, Liang J-J, Lin Y-L,  
611 Whitney MT, Chang G-JJ, Chen S-R, Wu S-R, Chao D-Y. 2018. Epitope resurfacing on  
612 dengue virus-like particle vaccine preparation to induce broad neutralizing antibody. *eLife*  
613 7:e38970.
- 614 22. Metz SW, Thomas A, White L, Stoops M, Corten M, Hannemann H, de Silva AM. 2018.  
615 Dengue virus-like particles mimic the antigenic properties of the infectious dengue virus  
616 envelope. *Virology* 15:60–60.
- 617 23. Richner JM, Himansu S, Dowd KA, Butler SL, Salazar V, Fox JM, Julander JG, Tang WW,  
618 Shresta S, Pierson TC, Ciaramella G, Diamond MS. 2017. Modified mRNA Vaccines Protect  
619 against Zika Virus Infection. *Cell* 169:176.
- 620 24. Richner JM, Jagger BW, Shan C, Fontes CR, Dowd KA, Cao B, Himansu S, Caine EA, Nunes  
621 BTD, Medeiros DBA, Muruato AE, Foreman BM, Luo H, Wang T, Barrett AD, Weaver SC,  
622 Vasconcelos PFC, Rossi SL, Ciaramella G, Mysorekar IU, Pierson TC, Shi P-Y, Diamond MS.  
623 2017. Vaccine Mediated Protection Against Zika Virus-Induced Congenital Disease. *Cell*  
624 170:273-283.e12.
- 625 25. Pardi N, Hogan MJ, Naradikian MS, Parkhouse K, Cain DW, Jones L, Moody MA, Verkerke  
626 HP, Myles A, Willis E, LaBranche CC, Montefiori DC, Lobby JL, Saunders KO, Liao H-X,  
627 Korber BT, Sutherland LL, Scarce RM, Hraber PT, Tombácz I, Muramatsu H, Ni H, Balikov  
628 DA, Li C, Mui BL, Tam YK, Krammer F, Karikó K, Polacino P, Eisenlohr LC, Madden TD, Hope  
629 MJ, Lewis MG, Lee KK, Hu S-L, Hensley SE, Cancro MP, Haynes BF, Weissman D. 2018.  
630 Nucleoside-modified mRNA vaccines induce potent T follicular helper and germinal center  
631 B cell responses. *J Exp Med* 215:1571–1588.
- 632 26. Lutz J, Lazzaro S, Habbedine M, Schmidt KE, Baumhof P, Mui BL, Tam YK, Madden TD,  
633 Hope MJ, Heidenreich R, Fotin-Mlczek M. 2017. Unmodified mRNA in LNPs constitutes a  
634 competitive technology for prophylactic vaccines. *NPJ Vaccines* 2.
- 635 27. Firdessa-Fite R, Creusot RJ. 2019. Nanoparticles versus Dendritic Cells as Vehicles to  
636 Deliver mRNA Encoding Multiple Epitopes for Immunotherapy. *Mol Ther Methods Clin Dev*  
637 16:50–62.
- 638 28. Liang F, Lindgren G, Lin A, Thompson EA, Ols S, Röhss J, John S, Hassett K, Yuzhakov O, Bahl  
639 K, Brito LA, Salter H, Ciaramella G, Loré K. 2017. Efficient Targeting and Activation of  
640 Antigen-Presenting Cells In Vivo after Modified mRNA Vaccine Administration in Rhesus  
641 Macaques. *Mol Ther* 25:2635–2647.
- 642 29. Crill WD, Hughes HR, Trainor NB, Davis BS, Whitney MT, Chang G-JJ. 2012. Sculpting  
643 humoral immunity through dengue vaccination to enhance protective immunity. *Front*  
644 *Immunol* 3:334–334.

- 645 30. Allison SL, Schalich J, Stiasny K, Mandl CW, Heinz FX. 2001. Mutational Evidence for an  
646 Internal Fusion Peptide in Flavivirus Envelope Protein E. *J Virol* 75:4268.
- 647 31. Urakami A, Ngwe Tun MM, Moi ML, Sakurai A, Ishikawa M, Kuno S, Ueno R, Morita K,  
648 Akahata W. 2017. An Envelope-Modified Tetravalent Dengue Virus-Like-Particle Vaccine  
649 Has Implications for Flavivirus Vaccine Design. *J Virol* 91:e01181-17.
- 650 32. Lok S-M, Kostyuchenko V, Nybakken GE, Holdaway HA, Battisti AJ, Sukupolvi-Petty S,  
651 Sedlak D, Fremont DH, Chipman PR, Roehrig JT, Diamond MS, Kuhn RJ, Rossmann MG.  
652 2008. Binding of a neutralizing antibody to dengue virus alters the arrangement of surface  
653 glycoproteins. *Nat Struct Mol Biol* 15:312–317.
- 654 33. Sukupolvi-Petty S, Austin SK, Purtha WE, Oliphant T, Nybakken GE, Schlesinger JJ, Roehrig  
655 JT, Gromowski GD, Barrett AD, Fremont DH, Diamond MS. 2007. Type- and Subcomplex-  
656 Specific Neutralizing Antibodies against Domain III of Dengue Virus Type 2 Envelope  
657 Protein Recognize Adjacent Epitopes. *J Virol* 81:12816–12826.
- 658 34. Roehrig JT, Bolin RA, Kelly RG. 1998. Monoclonal Antibody Mapping of the Envelope  
659 Glycoprotein of the Dengue 2 Virus, Jamaica. *Virology* 246:317–328.
- 660 35. Allison SL, Stadler K, Mandl CW, Kunz C, Heinz FX. 1995. Synthesis and secretion of  
661 recombinant tick-borne encephalitis virus protein E in soluble and particulate form. *J Virol*  
662 69:5816–5820.
- 663 36. Shang W, Liu J, Yang J, Hu Z, Rao X. 2012. Dengue virus-like particles: construction and  
664 application. *Appl Microbiol Biotechnol* 94:39–46.
- 665 37. Figueiredo Neto M, Figueiredo ML. 2016. Skeletal muscle signal peptide optimization for  
666 enhancing propeptide or cytokine secretion. *J Theor Biol*, 2016/08/27 ed. 409:11–17.
- 667 38. Karikó K, Muramatsu H, Welsh FA, Ludwig J, Kato H, Akira S, Weissman D. 2008.  
668 Incorporation of pseudouridine into mRNA yields superior nonimmunogenic vector with  
669 increased translational capacity and biological stability. *Mol Ther J Am Soc Gene Ther*  
670 16:1833–1840.
- 671 39. Karikó K, Muramatsu H, Ludwig J, Weissman D. 2011. Generating the optimal mRNA for  
672 therapy: HPLC purification eliminates immune activation and improves translation of  
673 nucleoside-modified, protein-encoding mRNA. *Nucleic Acids Res* 39:e142–e142.
- 674 40. Balsitis SJ, Williams KL, Lachica R, Flores D, Kyle JL, Mehlhop E, Johnson S, Diamond MS,  
675 Beatty PR, Harris E. 2010. Lethal Antibody Enhancement of Dengue Disease in Mice Is  
676 Prevented by Fc Modification. *PLoS Pathog* 6.
- 677 41. Zellweger RM, Shresta S. 2014. Mouse Models to Study Dengue Virus Immunology and  
678 Pathogenesis. *Front Immunol* 5.

- 679 42. Sarathy VV, Milligan GN, Bourne N, Barrett ADT. 2015. Mouse models of dengue virus  
680 infection for vaccine testing. *Vaccine* 33:7051–7060.
- 681 43. Pardi N, LaBranche CC, Ferrari G, Cain DW, Tombácz I, Parks RJ, Muramatsu H, Mui BL,  
682 Tam YK, Karikó K, Polacino P, Barbosa CJ, Madden TD, Hope MJ, Haynes BF, Montefiori DC,  
683 Hu S-L, Weissman D. 2019. Characterization of HIV-1 Nucleoside-Modified mRNA Vaccines  
684 in Rabbits and Rhesus Macaques. *Mol Ther - Nucleic Acids* 15:36–47.
- 685 44. Jackson LA, Anderson EJ, Roupael NG, Roberts PC, Makhene M, Coler RN, McCullough  
686 MP, Chappell JD, Denison MR, Stevens LJ, Pruijssers AJ, McDermott A, Flach B, Doria-Rose  
687 NA, Corbett KS, Morabito KM, O’Dell S, Schmidt SD, Swanson PA, Padilla M, Mascola JR,  
688 Neuzil KM, Bennett H, Sun W, Peters E, Makowski M, Albert J, Cross K, Buchanan W,  
689 Pikaart-Tautges R, Ledgerwood JE, Graham BS, Beigel JH. 2020. An mRNA Vaccine against  
690 SARS-CoV-2 — Preliminary Report. *N Engl J Med*  
691 <https://doi.org/10.1056/NEJMoa2022483>.
- 692 45. Mulligan MJ, Lyke KE, Kitchin N, Absalon J, Gurtman A, Lockhart S, Neuzil K, Raabe V,  
693 Bailey R, Swanson KA, Li P, Koury K, Kalina W, Cooper D, Fontes-Garfias C, Shi P-Y, Türeci  
694 Ö, Tompkins KR, Walsh EE, Frenck R, Falsey AR, Dormitzer PR, Gruber WC, Şahin U, Jansen  
695 KU. 2020. Phase I/II study of COVID-19 RNA vaccine BNT162b1 in adults. 7830. *Nature*  
696 586:589–593.
- 697 46. Anderson EJ, Roupael NG, Widge AT, Jackson LA, Roberts PC, Makhene M, Chappell JD,  
698 Denison MR, Stevens LJ, Pruijssers AJ, McDermott AB, Flach B, Lin BC, Doria-Rose NA,  
699 O’Dell S, Schmidt SD, Corbett KS, Swanson PA, Padilla M, Neuzil KM, Bennett H, Leav B,  
700 Makowski M, Albert J, Cross K, Edara VV, Floyd K, Suthar MS, Martinez DR, Baric R,  
701 Buchanan W, Luke CJ, Phadke VK, Rostad CA, Ledgerwood JE, Graham BS, Beigel JH. 2020.  
702 Safety and Immunogenicity of SARS-CoV-2 mRNA-1273 Vaccine in Older Adults. *N Engl J*  
703 *Med* 383:2427–2438.
- 704 47. VanBlargan LA, Himansu S, Foreman BM, Ebel GD, Pierson TC, Diamond MS. 2018. An  
705 mRNA Vaccine Protects Mice against Multiple Tick-Transmitted Flavivirus Infections. *Cell*  
706 *Rep* 25:3382-3392.e3.
- 707 48. Zhang M, Sun J, Li M, Jin X. 2020. Modified mRNA-LNP Vaccines Confer Protection against  
708 Experimental DENV-2 Infection in Mice. *Mol Ther - Methods Clin Dev* 18:702–712.
- 709 49. Henein S, Swanstrom J, Byers AM, Moser JM, Shaik SF, Bonaparte M, Jackson N, Guy B,  
710 Baric R, de Silva AM. 2017. Dissecting Antibodies Induced by a Chimeric Yellow Fever-  
711 Dengue, Live-Attenuated, Tetravalent Dengue Vaccine (CYD-TDV) in Naive and Dengue-  
712 Exposed Individuals. *J Infect Dis* 215:351–358.
- 713 50. Biswal S, Reynales H, Saez-Llorens X, Lopez P, Borja-Tabora C, Kosalaraksa P, Sirivichayakul  
714 C, Watanaveeradej V, Rivera L, Espinoza F, Fernando L, Dietze R, Luz K, Venâncio da Cunha  
715 R, Jimeno J, López-Medina E, Borkowski A, Brose M, Rauscher M, LeFevre I, Bizjajeva S,

716 Bravo L, Wallace D. 2019. Efficacy of a Tetravalent Dengue Vaccine in Healthy Children and  
717 Adolescents. *N Engl J Med* 381:2009–2019.

718 51. Kirkpatrick BD, Durbin AP, Pierce KK, Carmolli MP, Tibery CM, Grier PL, Hynes N, Diehl SA,  
719 Elwood D, Jarvis AP, Sabundayo BP, Lyon CE, Larsson CJ, Jo M, Lovchik JM, Luke CJ, Walsh  
720 MC, Fraser EA, Subbarao K, Whitehead SS. 2015. Robust and balanced immune responses  
721 to all 4 dengue virus serotypes following administration of a single dose of a live  
722 attenuated tetravalent dengue vaccine to healthy, flavivirus-naive adults. *J Infect Dis*  
723 212:702–710.

724 52. Anderson BR, Karikó K, Weissman D. 2013. Nucleofection induces transient eIF2 $\alpha$   
725 phosphorylation by GCN2 and PERK. *Gene Ther* 20:136–142.

726 53. Tian Y, Grifoni A, Sette A, Weiskopf D. 2019. Human T Cell Response to Dengue Virus  
727 Infection. *Front Immunol* 10.

728 54. Roth C, Cantaert T, Colas C, Prot M, Casadémont I, Levillayer L, Thalmensi J, Langlade-  
729 Demoyen P, Gerke C, Bahl K, Ciaramella G, Simon-Loriere E, Sakuntabhai A. 2019. A  
730 Modified mRNA Vaccine Targeting Immunodominant NS Epitopes Protects Against Dengue  
731 Virus Infection in HLA Class I Transgenic Mice. *Front Immunol* 10.

732 55. Hughes HR, Crill WD, Chang G-JJ. 2012. Manipulation of immunodominant dengue virus E  
733 protein epitopes reduces potential antibody-dependent enhancement. *Virology* 453:115–115.

734  
735



736 **FIGURE LEGENDS**

737

738 **Figure 1: DENV prM/E Vaccine Design and Viral Protein Expression**

739 A) Schematic of the DENV genome and engineered mRNA construct. An mRNA encoding for  
740 the prM and ENV viral proteins was engineered with N-terminal signal peptide sequence, 5' and  
741 3' untranslated regions (UTR) flanking the coding sequence, a 3' poly-A tail, and a 5' cap-1  
742 structure. *In vitro* synthesized mRNA is encapsulated in a lipid nanoparticle for use in *in vitro*  
743 and *in vivo* experiments. B) 293T cells were transfected with the *in vitro* transcribed mRNA  
744 encoding for the wild-type sequence (WT), or a mutant version with amino acid substitutions in  
745 the fusion-loop epitope ( $\Delta$ FL). Lysate was analyzed by western blot with the domain III specific  
746 1A1D-2 monoclonal antibody and the fusion-loop specific 4G2 monoclonal antibody. C)  
747 Supernatant from transfected cells was purified and concentrated through ultracentrifugation  
748 and analyzed for VLPs by western blots with the 1A1D-2 monoclonal antibody or anti-GAPDH.  
749 Unpurified cell lysate from WT mRNA transfected cells is included as a control. Shown are  
750 representative blots. D) Electron microscopy image of VLPs from purified supernatant of  
751 transfected 293T cells showing homogenous shape and size of approximately 30nm.

752

753 **Figure 2: Optimization of Signal Peptide and LNP Delivery**

754 A) Constructs were engineered with alternative signal peptides and *in vitro* transcribed mRNA  
755 was transfected into differentiated murine muscle myoblast C2C12 cells. Cell lysate was  
756 analyzed by western blot with 1A1D-2 monoclonal antibody or anti-GAPDH antibodies. B)  
757 Supernatant of transfected C2C12 cells was analyzed by dot blot with 1A1D-2. C) *In vitro*  
758 synthesized WT or  $\Delta$ FL mRNA was encapsulated into a lipid nanoparticle and administered to  
759 C2C12 cells. Lysate was analyzed by western blot with 1A1D-2 antibody. Shown are  
760 representative blots.

761



762 **Figure 3: DENV1 prM/E mRNA Vaccines Induce Neutralizing Antibody Response**

763 DENV1 prM/E mRNA-LNP vaccines were administered into 10 week-old C57Bl/6 mice. A.) Mice  
764 were administered 10ug of mRNA vaccine in a three-shot schedule and serum collected at the  
765 indicated time points. B) Serial dilutions of serum from vaccinated mice were analyzed for  
766 neutralization activity with a FRNT assay against DENV1 strain 16007. Neutralization curves at  
767 each timepoint are shown for WT vaccine recipients (left) and  $\Delta$ FL vaccine recipients (right).  
768 The average value +/- SEM of five vaccinated mice are shown. C.) Mice were administered a  
769 high (10ug) or low (3ug) dose of the mRNA vaccines, or vaccine encoding for GFP. A separate  
770 group of mice were infected with wild-type DENV1 following the same schedule. D) Antiviral IgG  
771 titers were determined by ELISA assays and the endpoint dilution titer calculated. E) Serum was  
772 analyzed by FRNT assays and the normalized percentage infection of each group is plotted as  
773 the mean +/- SEM for each serum dilution. N=5 mice per groups of mice infected with virus or  
774 receiving 3 ug vaccine doses. N=10 mice per group in mice receiving 10ug doses of the  $\Delta$ FL,  
775 and GFP vaccines. N=15 for mice receiving 10 ug doses of the WT vaccine. F) EC50 values of  
776 the neutralization curves from individual mice are shown. Statistical significance of each group  
777 compared to the GFP control was determined via unpaired T-test. P-values <0.01 are signified  
778 by \*\* and <0.001 by \*\*\*. Statistical comparisons with p-values >0.05 are not shown in this figure.  
779

780 **Figure 4: DENV1 prM/E mRNA Vaccines Induces Antiviral CD8<sup>+</sup> and CD4<sup>+</sup> T Cells**

781 DENV1 prM/E mRNA-LNP vaccines were administered into 10 week-old C57Bl/6 mice in a  
782 three-shot vaccination schedule. Spleens were harvested after the final vaccination dose (day  
783 56) and stimulated with an overlapping peptide array of DENV1 E protein, DENV2 E protein, or  
784 DENV1 NS1 protein. Stimulated cells were stained for the intracellular cytokine IFN $\gamma$  and  
785 analyzed by flow cytometry. Plotted is the IFN $\gamma$ <sup>+</sup> T cells as a percentage of total CD8<sup>+</sup> T cells  
786 (A) or CD4<sup>+</sup> T cells (B). N = 5 mice in the WT and  $\Delta$ FL vaccinated groups. Representative flow  
787 cytometry plots are shown in Supplemental Figure 1.

788

789 **Figure 5: DENV1 prM/E mRNA Vaccines Protect against a Lethal Challenge**

790 10ug DENV1 prM/E or GFP mRNA-LNP vaccines were administered to AG129 mice in a prime-  
791 boost schedule four weeks apart. N = 5 mice per group. A) Serum from vaccinated mice was  
792 isolated two-weeks after the boost and analyzed for neutralization by FRNT assay of serially-  
793 diluted serum samples. Plotted is the mean +/- SEM from five mice for each dilution. B) EC50  
794 values from each mouse are plotted. The vaccinated mice were then challenged with a lethal  
795 dose of DENV1 strain Western Pacific. Mice were monitored for weight (C) and survival (D) post  
796 challenge. P-values <0.01 are signified by \*\* and <0.001 by \*\*\*.

797

798 **Figure 6: Passive Transfer of Immune Sera Protects Against a Lethal Challenge**

799 Serum from naïve or WT prM/E mRNA vaccinated mice was passively transferred into AG129  
800 mice. One day after transfer, mice were challenged with a lethal dose of DENV1 strain Western  
801 Pacific. Mice were monitored for weight (A) and survival (B) post challenge. Survival curves  
802 comparing vaccinated and naïve serum recipients were analyzed by log-rank test and p-values  
803 <0.01 signified by \*\*.

804

805 **Figure 7: DENV1 prM/E mRNA Vaccination Results in Reduced ADE Levels**

806 Serum from naïve mice, WT prM/E mRNA vaccinated mice,  $\Delta$ FL prM/E mRNA vaccinated mice,  
807 or mice infected with DENV1, two weeks post boost were analyzed for enhancement of DENV2  
808 infection. Serial dilutions of serum were incubated with DENV2 and added to Fc $\gamma$  receptor-  
809 positive K562 cells. Fifteen hours later, infected cells were stained for intracellular ENV and  
810 quantified by flow cytometry. The percentage of infected cells was normalized to infection in the  
811 absence of serum. A.) The fold change in % of cells infected is shown compared to infections in  
812 the absence of serum. The average fold enhancement +/- SEM from five mice per group is

813 graphed. B.) A representative flow cytometry histogram of the ENV signal from each different  
814 treatment at a 1/100 serum dilution is shown.

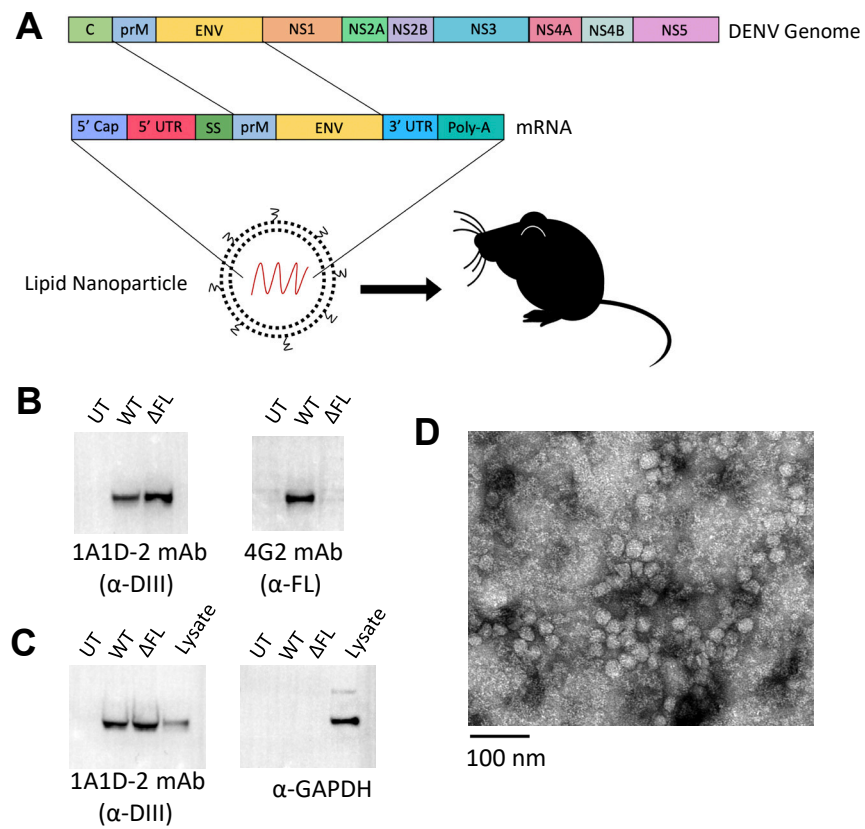

Figure 1

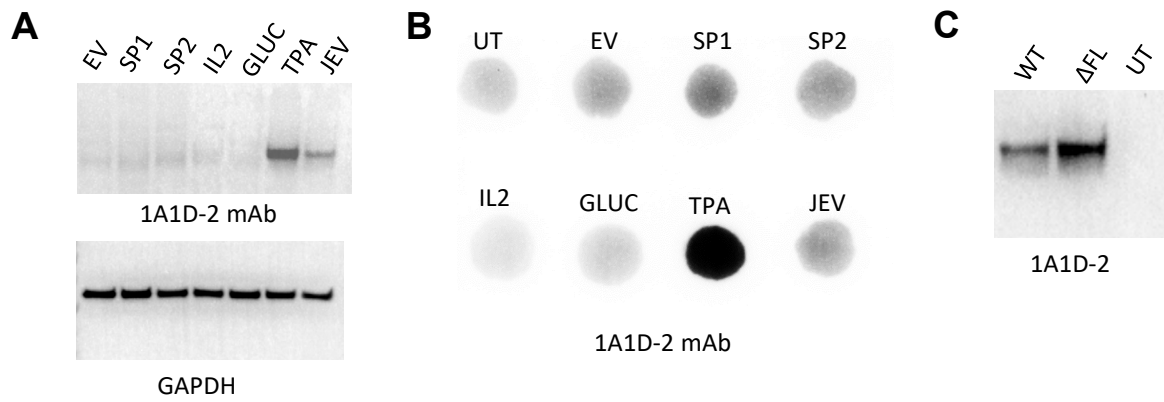

Figure 2

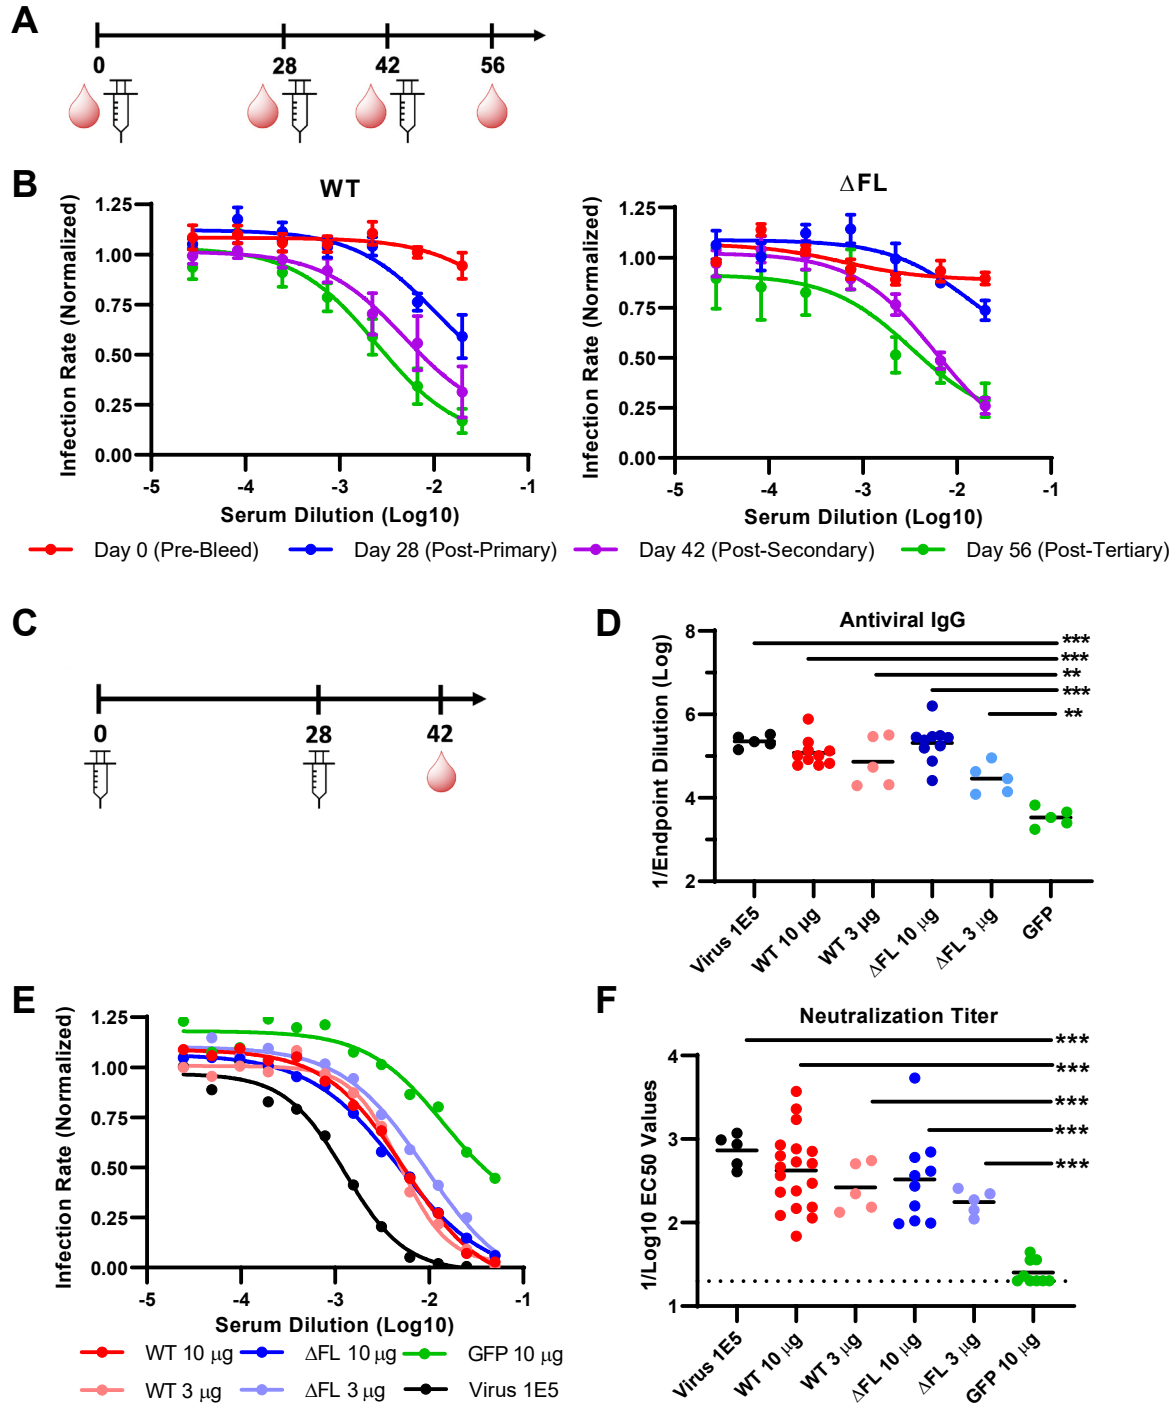

Figure 3

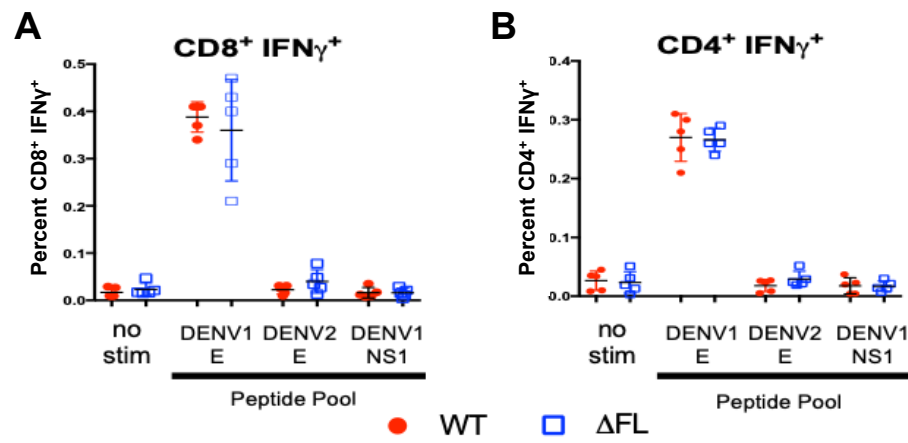

Figure 4

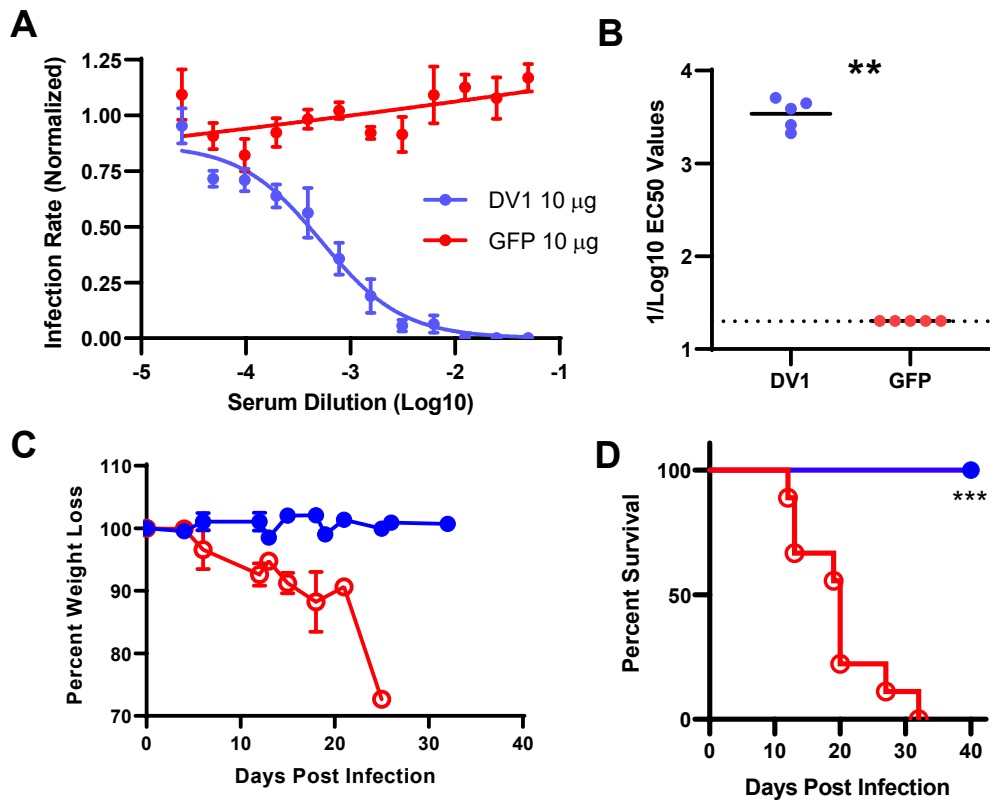

Figure 5



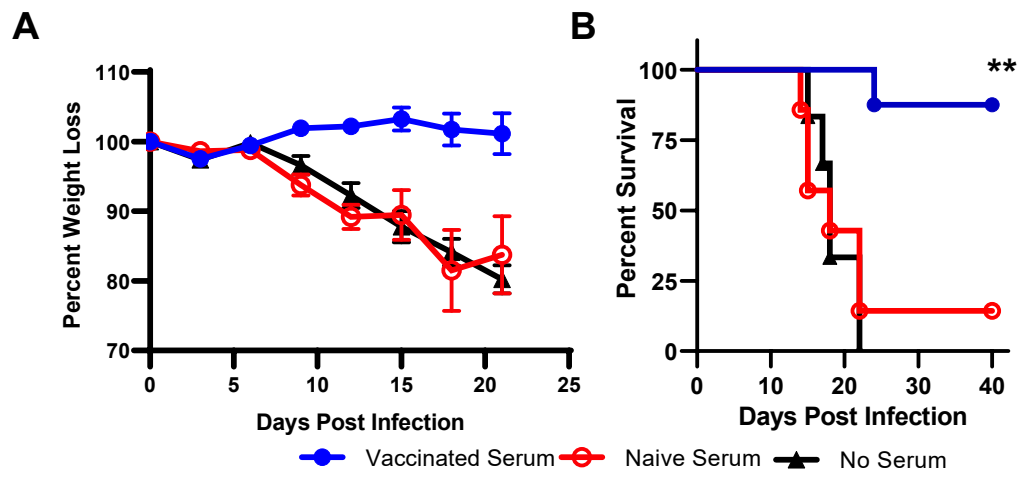

Figure 6

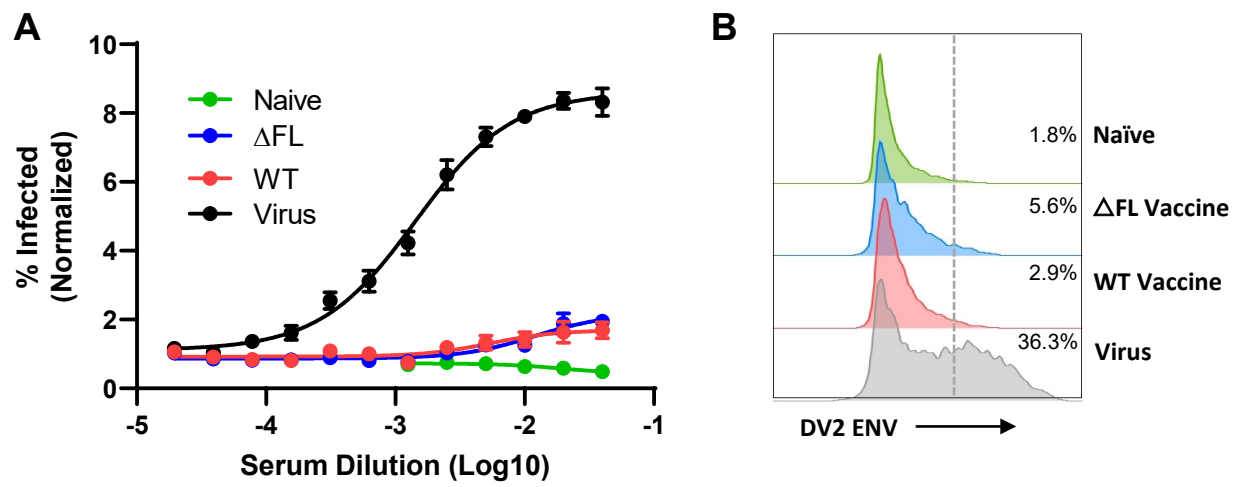

Figure 7
